# Supplementary material for: A selenium@polypyrrole hollow sphere cathode for rechargeable lithium batteries
Source: Royal Society of Chemistry journal article supplement (doi:10.1039/c4ra14945a), 2015-01-01
Supplement: c4ra14945a1.pdf [file c4ra14945a1.pdf]

## Supplementary Information for

# A selenium@polypyrrole hollow sphere cathode for rechargeable lithium batteries

Jing Guo, Zhaoyin Wen\*, Guoqiang Ma, Jun Jin, Weiqi Wang, Yu Liu

CAS Key Laboratory of Materials for Energy Conversion,  
Shanghai Institute of Ceramics, Chinese Academy of Sciences,  
Shanghai, China 200050.

Fax: +86-21-52413903; Tel: +86-21-52411704;

Email: zywen@mail.sic.ac.cn

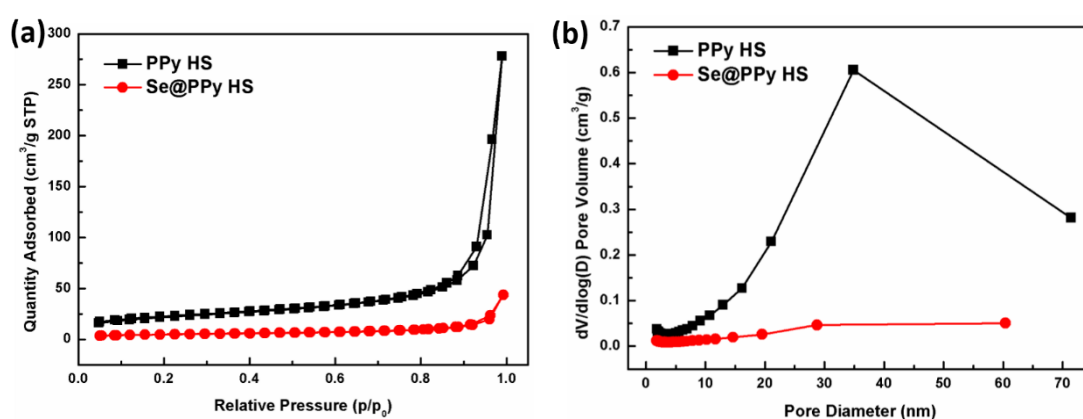

**Supplementary Figure S1.** (a) N<sub>2</sub> adsorption/desorption isotherms, (b) pore size distribution of the PPy hollow spheres and Se@PPy HS composite. After Se loading, the specific surface area (78 m<sup>2</sup>/g) and pore volume (0.43 cm<sup>3</sup>/g) of PPy hollow spheres reduce to 17 m<sup>2</sup>/g and 0.07 cm<sup>3</sup>/g, respectively.

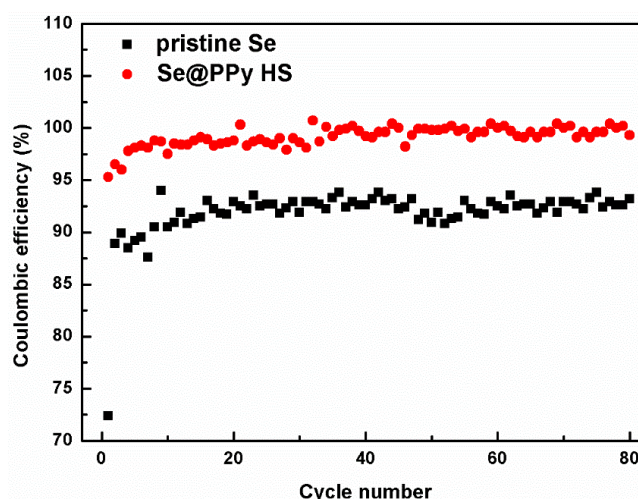

**Supplementary Figure S2.** Coulombic efficiency of Se@PPy HS and pristine Se at 0.2C (with a scale range of 70% - 110%).
